# 1                    **Early Crowdfunding Response to the COVID-19 Pandemic**

## 3                    **Authors:**

4                    Sameh N. Saleh, MD<sup>1,2</sup>, Christoph U. Lehmann, MD<sup>2,3</sup>, Richard J. Medford, MD<sup>1,2</sup>

5                    <sup>1</sup> Department of Internal Medicine, University of Texas Southwestern Medical Center, 5323  
6                    Harry Hines Boulevard, Dallas, TX 75390

7                    <sup>2</sup> Clinical Informatics Center, University of Texas Southwestern Medical Center, 5323 Harry  
8                    Hines Boulevard, Dallas, TX 75390

9                    <sup>3</sup> Department of Pediatrics, University of Texas Southwestern Medical Center, 5323 Harry Hines  
10                    Boulevard, Dallas, TX 75390

19                    **Short Title:** Crowdfunding in COVID-19 Pandemic

## 20                    **Corresponding Author:**

21                    Sameh N. Saleh

22                    M: 571-338-3680

23                    F: 214-648-9478

24                    E: [sameh.n.saleh@gmail.com](mailto:sameh.n.saleh@gmail.com)

25 **Abstract**

26 **Background:** As the number of COVID-19 cases increased precipitously in the US,  
27 policymakers and health officials marshalled their pandemic responses. As the economic impacts  
28 multiplied, anecdotal reports noted the increased use of online crowdfunding to defray these  
29 costs. We examined the online crowdfunding response in the early stage of the COVID-19  
30 pandemic in the US.

31 **Methods:** On May 16, 2020, we extracted all available data available on US campaigns created  
32 between January 1 and May 10, 2020 on GoFundMe and identified the subset of COVID-related  
33 campaigns using keywords relevant to the COVID-19 pandemic. We explored incidence of  
34 COVID-related campaigns by geography, by category, and over time and compared campaign  
35 characteristics to non-COVID-related campaigns after March 11 when the pandemic was  
36 declared.

37 **Results:** We found that there was a substantial increase in overall GoFundMe online  
38 crowdfunding campaigns in March, largely attributable to COVID-related campaigns. However,  
39 as the COVID-19 pandemic persisted and progressed, the number of campaigns per COVID-19  
40 cases declined more than tenfold across all states. COVID-related campaigns raised more money,  
41 had a longer narrative description, and were more likely to be shared on Facebook than other  
42 campaigns in the study period.

43 **Conclusions:** Online crowdfunding appears to be a transient stopgap, predicated on the novelty  
44 of an emergency rather than the true sustained need of a community. Rather, crowdfunding  
45 activity is likely an early marker for communities in acute distress that could be used by  
46 governments and aid organizations to guide disaster relief and policy.

47 **Trial registration:** N/A

48

49 **Keywords:** crowdfunding; fundraising; GoFundMe; COVID-19; pandemic; natural disasters;

50 disaster relief

51

52

53

54

55

56

57

58

59

60

61

62

63

64

65

66

67

68

69

70

## 71 **Background**

72 As the number of coronavirus 2019 cases (COVID-19) precipitously accelerated in  
73 March throughout the United States (US), government and public health departments marshalled  
74 their pandemic responses. Support efforts quickly became necessary as shortages of medical  
75 supplies and testing worsened by the continued spread of the virus affected health care  
76 organizations, medical offices, and nursing homes(1). While the first effects of the pandemic  
77 were health-related, the economic ramifications including rapidly increasing unemployment and  
78 loss of revenue quickly followed the spread of the disease and public health efforts to contain  
79 it(2,3). Temporary and permanent closure of small businesses, furloughing whole sectors of the  
80 economy (e.g. airline and restaurant industries), and food price inflation added social, financial,  
81 and medical strains to the population(4,5). Subsequent effects of the pandemic such as the  
82 increased number of deaths and associated funeral costs added additional financial stress to the  
83 lives of Americans.

84 Online crowdfunding has become an increasingly popular tool to finance medical  
85 treatment, respond to financial hardships and natural disasters, and defray the downstream  
86 economic impacts of personal healthcare costs(6,7). Despite anecdotal reports of the increased  
87 use of online crowdfunding to mitigate the economic impacts of COVID-19(8), details on if and  
88 how crowdfunding has been used for COVID-19 relief efforts remain unclear. We evaluate  
89 online crowdfunding campaigns in the US in the early stages of the COVID-19 pandemic on the  
90 GoFundMe platform, which represents 90% of the social crowdfunding market in the US as of  
91 2018(9).

## 92 **Methods**

93 We extracted (on May 16, 2020) all active US campaigns created between January 1 and  
94 May 10, 2020 on GoFundMe, the largest online crowdfunding platform in the US. The time  
95 frame reflects approximately 2 months before and after the World Health Organization (WHO)  
96 declaration of the pandemic on March 11, 2020. We used the BeautifulSoup library(10) to web  
97 scrape all data available for the GoFundMe campaigns and excluded all campaigns that  
98 originated outside the US. We list all extracted data fields in Appendix Table 1. We used  
99 keywords relevant to the COVID-19 pandemic to identify and label the subset of COVID-related  
100 campaigns (Appendix Table 2). The University of Texas Southwestern Human Research  
101 Protection Program Policies, Procedures, and Guidance did not require institutional review board  
102 approval as all data were publicly available.

103 We examined weekly new COVID-related campaigns juxtaposed with the weekly new  
104 COVID-19 cases both nationally and by state or territory. We evaluated the incidence of  
105 campaigns by state adjusted for new COVID-19 cases by week to determine the relationship  
106 between disease burden and campaign initiation. To allow for comparison among states, we  
107 defined week 0 as the first week that each state had at least 100 new weekly cases. We displayed  
108 all states, but only highlighted the top six states by overall campaigns by million. Given the  
109 presence of zip code level data, we also explored more granular community trends. We also  
110 evaluated changes in COVID-related campaigns per million for each state and campaign  
111 categories over time.

112 We compared campaign characteristics, including fundraising, campaign information,  
113 and campaign category, for COVID-19 and non-COVID-related campaigns over the same time  
114 period from March 11th to May 10th. We used Mann-Whitney U,  $\chi^2$ , and Fisher's exact testing  
115 where appropriate to determine significance. Alpha level of significance was set a priori at 0.05

116 and all hypothesis testing was two-sided. We did not adjust for multiple comparisons as this was  
117 an exploratory study and should be interpreted as hypothesis-generating. Analyses were  
118 performed using Python, version 3.7.2 (Python Software Foundation).

## 119 **Results**

120 Of 310,695 total new campaigns created between January 1 and May 10, 2020, we  
121 analyzed 232,827 campaigns from the US across all categories. Twenty-two percent of these or  
122 51,763 campaigns were identified as COVID-related and collectively raised \$237,418,235 by  
123 May 10, 2020. The vast majority of COVID related campaigns were established after March 11th  
124 (50,828 or 98.2%). New GoFundMe campaigns had a peak in mid-March, mainly due to new  
125 campaigns related to or referencing COVID-19 and declined in April (Figure 1). This COVID-  
126 related increase in campaigns was observed before the national peak of new COVID-19 cases in  
127 April. Subsequently, the incidence of new campaigns declined while the incidence of new  
128 COVID-19 cases remained steady or declined slightly.

129 Adjusting for the weekly incidence of COVID-19 cases, all US states had their peak of  
130 new COVID-related campaigns within 2 weeks of their first week when 100 new cases were  
131 diagnosed in that state. For many states, the rate of COVID-related campaigns per case dropped  
132 by at tenfold after the first 2 to 3 weeks (Figure 2). Population rich states that also had early  
133 spread of COVID-19 like New York, New Jersey, Massachusetts, Washington, and Illinois had  
134 the most COVID-related campaigns per million inhabitants (Figure 3), but were ultimately  
135 among the states with the lowest COVID-related campaigns per 1,000 cases during the study  
136 period.

137 From March 11th to May 10th 2020, non-COVID-related campaigns (n=91,631) raised a  
138 median of \$625 ((interquartile range [IQR], \$135–\$2300) while COVID-related campaigns

139 (n=50,828) raised a median of \$930 IQR, \$220–\$3,075), nearly 50% more per campaign ( $p <$   
140 0.001). Fundraising goals were higher in COVID-related (median [IQR], \$5,000 [\$2,000 to  
141 \$10,000]) than non-COVID-related (median [IQR], \$4,000 [\$1,250 to \$10,000]) campaigns ( $p$   
142  $<0.001$ ). Even with the higher fundraising goals, COVID-related campaigns (median [IQR],  
143 25.0% [5.5% to 69.5%]) raised a higher percent of the fundraising goal than non-COVID-related  
144 campaigns (median [IQR], 22.2% [5.0% to 65.5%]) by date of data extraction ( $p <0.001$ ).  
145 COVID-related campaigns (median [IQR], 23 [0–163]) had significantly more Facebook shares  
146 than non-COVID-related campaigns (0 [0–145]) ( $p <0.001$ ). COVID-related campaigns also had  
147 a longer narrative in their campaign description, were more likely to be listed as a charity, and  
148 more likely to have the campaigner be the same as the beneficiary (Table 1).

149 Creators of COVID-related campaigns selected the following categories most commonly  
150 (in descending order by number of campaigns): 1) Accidents & Emergencies, 2) Medical Illness  
151 & Healing, 3) Community & Neighbors, 3) Business & Entrepreneurs, 5) Funerals & Memorials  
152 (Exhibit 5). Accidents & Emergencies as well as Community & Neighbors Medical Illness &  
153 Healing had the earliest peaks (Figure 4a). A week later, the category Business & Entrepreneurs  
154 peaked, but this appeared to be driven by an isolated spike on March 24th (Figure 4b). Medical  
155 Illness & Healing peaked next within the following 2 weeks. As these initial spikes decreased  
156 significantly, Funerals & Memorials campaigns lagged the first peak by 4 weeks. Compared to  
157 non-COVID-related campaigns after March 11th, COVID-related campaigns had more  
158 campaigns in Accidents & Emergencies, Community & Neighbors, and Business and  
159 Entrepreneurs and less campaigns in Funerals & Memorials and Animals & Pets.

## 160 **Discussion**

161 Early in the COVID-19 pandemic, people were more likely to create COVID-19  
162 campaigns. There was a substantial increase in overall GoFundMe online crowdfunding  
163 campaigns in March, mostly attributable to COVID-related campaigns. COVID-related  
164 campaigns raised more money than other campaigns, had a longer narrative description, and  
165 were more likely to be shared on Facebook. However, as the COVID-19 pandemic progressed,  
166 its novelty wore off. As COVID-19 became a familiar ubiquitous problem, the number of  
167 campaigns per COVID-19 cases declined across all states. This observation may be explained by  
168 potential campaign developers weighing the effort required to create a campaign with a shrinking  
169 potential for reward. Initially, the novelty and uniqueness of COVID-19 cases and with it, the  
170 chance of a campaign to “go viral”, reach many people, and generate large donations may have  
171 convinced potential campaign builders that COVID-related illness or financial hardships might  
172 be perceived as causes that others would support. As the issue became widespread and the  
173 ability to set a campaign apart as a worthy cause became more difficult, the effort (cost) of  
174 creating a campaign may have been outweighed by the perceived likelihood of funding. As  
175 others have found, the concept of worthiness and augmenting one’s “illness narrative” become  
176 important factors in generating campaign appeal, influence, and ultimately fundraising  
177 success(11–13). The states with the earliest disease burden had the least campaigns per case  
178 indicating a lack of a case-dependent response, supporting the hypothesis that potential campaign  
179 designers perceive common illnesses as less likely to receive the attention of donors over time.

180 While raising millions of dollars, our study suggests that online crowdfunding does not  
181 function as a true financial safety net. Medical expenses related to COVID-19 in the US are  
182 estimated to be in excess of \$163 billion if 20% of the population were to be infected (on August  
183 26, 2020, approximately 1.8% of the population had a confirmed infection)(14). Rather,



184 crowdfunding more likely functions as a weathervane indicating a novel crisis. Further,  
185 crowdfunding is heavily swayed by marketing and storytelling as it points a majority of the funds  
186 towards a few cases rather than aiding the many(8,15).

187 The large number of categories for COVID-related GoFundMe campaigns tells a  
188 poignant story of the broad, destructive effect that COVID-19 had on society. Beyond creating  
189 the need to cover unexpected costly medical expenses, COVID-19 devastated small businesses,  
190 skyrocketed unemployment, created food and housing insecurities, generated unexpected  
191 expenses such as funeral costs, and increased debt(5). The campaign categories reflected the  
192 progression of the COVID-19 funding response with the earliest peaks for accidents and  
193 emergencies and the late growth and plateau for funerals and memorials. Spike in business  
194 campaigns was likely heavily based around the launch of the Small Business Relief Initiative on  
195 March 2(16).

196 As newly generated GoFundMe campaigns showed a temporal correlation to the  
197 pandemic's effect on society, we contemplated that GoFundMe campaigns may actually serve as  
198 an early marker for any community in distress. To explore this hypothesis, we isolated  
199 campaigns from smaller communities that have been affected by a natural disaster including  
200 Puerto Rico (earthquake from January 6-7, 2020), Nashville (tornado from March 2-3, 2020),  
201 and Mississippi (tornado from April 12-13, 2020). We were able to discern an immediate peak  
202 for GoFundMe campaigns following each event (Appendix Figure 1).

203 While GoFundMe campaigns failed to meet the needs of those seeking support as  
204 demonstrated by the small fraction of funding goals met by data extraction date, it appears  
205 however to be an accurate, early marker for a community, region, state, or country in distress.  
206 This measure is not limited to medical emergencies and extends to natural disasters. Future

207 research will show what type of negative events that affect communities may be reflected by a  
208 spike in GoFundMe campaigns. We propose the development of a measure using rapid rise in  
209 new GoFundMe campaigns as an early indicator of community distress.

210 While we were able to analyze the full available set of GoFundMe campaigns, which  
211 strengthened our study, it had several limitations. First, we used data from one crowdfunding  
212 platform only. While GoFundMe is the largest platform in the US by number of campaigns, our  
213 study may have suffered from selection bias. Because of the large number of campaigns, we are  
214 unable to validate that campaigns using COVID-related keywords were indeed designed to  
215 mitigate the effect of COVID-19. Moreover, while we note significant differences in campaign  
216 and funding characteristics between COVID-related and non-COVID-related campaigns, future  
217 work will be important to further understand reasons for these differences and their implications  
218 on long-term crowdfunding. Lastly, we only analyze the first few months of COVID-related  
219 campaigns; therefore, more longitudinal analysis will be important to understand more  
220 completely how peaks and troughs in COVID-19 incidence nationally and in particular,  
221 communities affect campaign frequency.

## 222 **Conclusions**

223 Online crowdfunding activity leverages a galvanized public reaction early in a public  
224 health emergency like COVID-19. However, as disease spread persists and economic burden  
225 continues to grow nationally, the creation of new campaigns fades. Online crowdfunding appears  
226 to be a transient stopgap, predicated on the novelty of an emergency rather than the true  
227 sustained need of a community.

228 More importantly than its rather weak effect of mitigating the effect of the crisis,  
229 crowdfunding activity is likely an early marker for communities in acute distress. It could be

230 monitored by local, state, and federal government agencies such as Federal Emergency  
231 Management Association (FEMA) as an early marker for emergencies and need for support.  
232 Future research will determine what emergencies generate the strongest signals in crowdfunding  
233 activities.

## 234 **Declarations**

235 Ethics approval and consent to participate: The University of Texas Southwestern Human  
236 Research Protection Program Policies, Procedures, and Guidance did not require institutional  
237 review board approval as all data were publicly available.

238 Consent for publication: Not applicable

239 Availability of data and materials: The data that support the findings of this study are available  
240 upon request.

241 Competing interests: Dr. Lehmann reports stock ownership in Celanese Corporation and Colfax  
242 Corporation. There are no other competing interests.

243 Funding: None.

244 Authors' contributions: Study concept and design: SS, RJM; Data acquisition: SNS; Analysis:  
245 SNS; Interpretation of data: SNS, CUL; Manuscript preparation: all authors. All authors read and  
246 approved the final manuscript.

247 Acknowledgements: Not applicable

248

249

250

251

252

253

254

## 255 **References**

- 256 1. Emanuel EJ, Persad G, Upshur R, Thome B, Parker M, Glickman A, et al. Fair Allocation  
257 of Scarce Medical Resources in the Time of Covid-19. *N Engl J Med* [Internet]. 2020 May  
258 21 [cited 2020 Aug 24];382(21):2049–55. Available from:  
259 <http://www.nejm.org/doi/10.1056/NEJMsb2005114>
- 260 2. Almost 25 million jobs could be lost worldwide as a result of COVID-19, says ILO  
261 [Internet]. International Labour Organization; 2020 Mar [cited 2020 Aug 4]. Available  
262 from: [https://www.ilo.org/global/about-the-ilo/newsroom/news/WCMS\\_738742/lang--](https://www.ilo.org/global/about-the-ilo/newsroom/news/WCMS_738742/lang--en/index.htm)  
263 [en/index.htm](https://www.ilo.org/global/about-the-ilo/newsroom/news/WCMS_738742/lang--en/index.htm)
- 264 3. Tappe, Anneken. 30 million Americans have filed initial unemployment claims since mid-  
265 March. *CNN Business* [Internet]. 2020 Apr 30 [cited 2020 Jul 1]; Available from:  
266 <https://www.cnn.com/2020/04/30/economy/unemployment-benefits-coronavirus/index.html>
- 267 4. Sherwan, Erik. Coronavirus wreaks havoc on Chinese food producers, sending inflation  
268 soaring. *Fortune* [Internet]. 2020 Feb 15 [cited 2020 Jul 13]; Available from:  
269 <https://fortune.com/2020/02/15/china-coronavirus-business-impact-inflation-economy/>
- 270 5. Nicola M, Alsafi Z, Sohrabi C, Kerwan A, Al-Jabir A, Iosifidis C, et al. The socio-  
271 economic implications of the coronavirus pandemic (COVID-19): A review. *International*  
272 *Journal of Surgery* [Internet]. 2020 Jun [cited 2020 Aug 24];78:185–93. Available from:  
273 <https://linkinghub.elsevier.com/retrieve/pii/S1743919120303162>
- 274 6. Saleh SN, Ajufo E, Lehmann CU, Medford RJ. Crowdfunding Medical Care: A  
275 Comparison of Online Medical Fundraising in Canada, the United Kingdom, and the United

- 276 States. medRxiv [Internet]. 2020 Jan 1;2020.03.26.20044669. Available from:  
277 <http://medrxiv.org/content/early/2020/03/30/2020.03.26.20044669.abstract>
- 278 7. Bassani G, Marinelli N, Vismara S. Crowdfunding in healthcare. J Technol Transf  
279 [Internet]. 2019 Aug [cited 2019 Dec 24];44(4):1290–310. Available from:  
280 <http://link.springer.com/10.1007/s10961-018-9663-7>
- 281 8. Nathaniel Popper, Taylor Lorenz. GoFundMe Confronts Coronavirus Demand. The New  
282 York Times [Internet]. 2020 Mar 26 [cited 2020 Jul 13]; Available from:  
283 <https://www.nytimes.com/2020/03/26/style/gofundme-coronavirus.html>
- 284 9. Ainsley Harris. GoFundMe keeps gobbling up competitors, says it’s “very good for the  
285 market.” Fast Company [Internet]. 2018 Apr 4; Available from:  
286 [https://www.fastcompany.com/40554199/gofundme-keeps-gobbling-up-competitors-says-](https://www.fastcompany.com/40554199/gofundme-keeps-gobbling-up-competitors-says-its-very-good-for-the-market)  
287 [its-very-good-for-the-market](https://www.fastcompany.com/40554199/gofundme-keeps-gobbling-up-competitors-says-its-very-good-for-the-market)
- 288 10. BeautifulSoup [Internet]. Available from:  
289 <https://www.crummy.com/software/BeautifulSoup/bs4/>
- 290 11. Suzanne Woolley. American Health Care Tragedies Are Taking Over Crowdfunding.  
291 Bloomberg [Internet]. 2017 Jun 12; Available from:  
292 [https://www.bloomberg.com/news/articles/2017-06-12/america-s-health-care-crisis-is-a-](https://www.bloomberg.com/news/articles/2017-06-12/america-s-health-care-crisis-is-a-gold-mine-for-crowdfunding)  
293 [gold-mine-for-crowdfunding](https://www.bloomberg.com/news/articles/2017-06-12/america-s-health-care-crisis-is-a-gold-mine-for-crowdfunding)
- 294 12. Berliner LS, Kenworthy NJ. Producing a worthy illness: Personal crowdfunding amidst  
295 financial crisis. Social Science & Medicine [Internet]. 2017 Aug [cited 2019 Oct  
296 20];187:233–42. Available from:  
297 <https://linkinghub.elsevier.com/retrieve/pii/S0277953617300886>

- 298 13. Lukk M, Schneiderhan E, Soares J. Worthy? Crowdfunding the Canadian Health Care and  
299 Education Sectors: Health Care and Education Crowdfunding. Canadian Review of  
300 Sociology/Revue canadienne de sociologie [Internet]. 2018 Aug [cited 2019 Oct  
301 20];55(3):404–24. Available from: <http://doi.wiley.com/10.1111/cars.12210>
- 302 14. Bartsch SM, Ferguson MC, McKinnell JA, O’Shea KJ, Wedlock PT, Siegmund SS, et al.  
303 The Potential Health Care Costs And Resource Use Associated With COVID-19 In The  
304 United States: A simulation estimate of the direct medical costs and health care resource  
305 use associated with COVID-19 infections in the United States. Health Affairs [Internet].  
306 2020 Jun 1 [cited 2020 Sep 5];39(6):927–35. Available from:  
307 <http://www.healthaffairs.org/doi/10.1377/hlthaff.2020.00426>
- 308 15. Sumin Lee, Vili Lehdonvirta. New Digital Safety Net or Just More ‘Friendfunding’?  
309 Institutional Analysis of Medical Crowdfunding in the United States. SSRN. 2020 Mar 5;
- 310 16. GoFundMe Launches Relief Initiative to Help Small Business Impacted By COVID-19 in  
311 Partnership with Yelp. Business Wire [Internet]. 2020 Mar 24 [cited 2020 Jul 13];  
312 Available from:  
313 [https://www.businesswire.com/news/home/20200324005364/en/GoFundMe-Launches-](https://www.businesswire.com/news/home/20200324005364/en/GoFundMe-Launches-Relief-Initiative-Small-Business-Impacted)  
314 [Relief-Initiative-Small-Business-Impacted](https://www.businesswire.com/news/home/20200324005364/en/GoFundMe-Launches-Relief-Initiative-Small-Business-Impacted)

315  
316  
317  
318  
319  
320

321  
 322 **Table 1.** Baseline campaign characteristics stratified by COVID-related status. Only campaigns  
 323 created after March 1, 2020 are included. Continuous variables are presented as median (IQR)  
 324 and categorical variables as number (%).

|                                        | <b>Total Campaigns<br/>n = 142,459</b> | <b>COVID-Related<br/>Campaigns<br/>n = 50,828</b> | <b>Non COVID-Related<br/>Campaigns<br/>n = 91,631</b> | <b>p<sup>a</sup></b> |
|----------------------------------------|----------------------------------------|---------------------------------------------------|-------------------------------------------------------|----------------------|
| <b>Fundraising</b>                     |                                        |                                                   |                                                       |                      |
| Goal, median (IQR), \$ US              | 5,000 (1,500 – 10,000)                 | 5,000 (2,000 – 10,000)                            | 4,000 (1,250 – 10,000)                                | <0.001               |
| Raised, median (IQR), \$ US            | 722 (160 – 2,565)                      | 930 (220 – 3,075)                                 | 625 (135 – 2,300)                                     | <0.001               |
| Percent of goal funded, median (IQR)   | 23.3 (5.2 – 66.9)                      | 25.0 (5.5 – 69.5)                                 | 22.2 (5.0 – 65.5)                                     | <0.001               |
| Donors, median (IQR)                   | 12 (3 – 35)                            | 14 (4 – 40)                                       | 11 (3 – 32)                                           | <0.001               |
| Amount per donation, median (IQR) \$US | 56.3 (35.4 – 86.8)                     | 59.9 (39.0 – 92.7)                                | 54.5 (33.8 – 83.5)                                    | <0.001               |
| Met funding goal, No. (%)              | 20,593 (14.5)                          | 7,302 (14.4)                                      | 13,291 (14.5)                                         | 0.48                 |
| <b>Campaign Information</b>            |                                        |                                                   |                                                       |                      |
| Campaigner = beneficiary, No. (%)      | 119,243 (83.7)                         | 43,445 (85.5)                                     | 75,798 (82.7)                                         | <0.001               |
| Is listed as a charity, No. (%)        | 7,144 (5.0)                            | 3,629 (7.1)                                       | 3,515 (3.8)                                           | <0.001               |
| Narrative, median (IQR), words         | 145 (84 – 240)                         | 187 (115 – 299)                                   | 125 (72 – 207)                                        | <0.001               |
| Narrative, median (IQR), characters    | 56.3 (35.4 – 86.8)                     | 1,072 (652 – 1,729)                               | 691 (393 – 1,154)                                     | <0.001               |
| Active donation days, median (IQR)     | 23 (14 – 33)                           | 24 (15 – 38)                                      | 22 (13 – 31)                                          | <0.001               |
| Facebook shares, median (IQR)          | 4 (0 – 152)                            | 23 (0 – 163)                                      | 0 (0 – 145)                                           | <0.001               |
| GoFundMe hearts, median (IQR)          | 12 (3 – 33)                            | 14 (4 – 38)                                       | 10 (3 – 31)                                           | <0.001               |
| <b>Campaign Category (top 8 of 17)</b> |                                        |                                                   |                                                       |                      |
| Accidents & Emergencies, No. (%)       | 25,306 (17.8)                          | 10,705 (21.1)                                     | 14,601 (15.9)                                         | <0.001               |
| Medical Illness & Healing, No. (%)     | 22,669 (15.9)                          | 8,484 (16.7)                                      | 14,185 (15.5)                                         | <0.001               |
| Funerals & Memorials, No. (%)          | 19,577 (13.7)                          | 3,242 (6.4)                                       | 16,335 (17.8)                                         | <0.001               |
| Community & Neighbors, No. (%)         | 14,237 (10.0)                          | 7,008 (13.8)                                      | 9,027 (7.9)                                           | <0.001               |
| Business & Entrepreneurs, No. (%)      | 11,451 (8.0)                           | 6,458 (12.7)                                      | 7,229 (5.4)                                           | <0.001               |
| Animals & Pets, No. (%)                | 11,158 (7.8)                           | 2,131 (4.2)                                       | 9,027 (9.9)                                           | <0.001               |
| Babies, Kids, & Family, No. (%)        | 6,265 (4.4)                            | 1,990 (3.9)                                       | 4,275 (4.7)                                           | <0.001               |
| Volunteer & Service, No. (%)           | 5,176 (3.6)                            | 2,643 (5.2)                                       | 2,533 (2.8)                                           | <0.001               |

<sup>a</sup> Given the non-Gaussian populations, we used Mann-Whitney U, Chi-squared, and Fischer's exact testing to detect statistical differences among the three groups.

325

326

327

328

329

330

331 **Figure 1.** New campaigns by week versus incident COVID-19 cases by week. Yellow bars  
332 indicate COVID-related campaigns, blue bars indicate non-COVID-related campaigns, and the  
333 dotted line shows the number of incident cases.

334

335 **Figure 2.** COVID-related campaigns per 1000 COVID-19 incident cases for each state. Week 0  
336 is defined as the first week that a state had more than 100 cases to allow for direct comparison  
337 among states. All states are shown, but only the top 6 states for total COVID-19 cases per  
338 million are highlighted in color (as ordered from most to least in the legend).

339

340 **Figure 3.** COVID-related campaigns per million by week by state. All states are shown, but only  
341 the top 6 states for total COVID-19 cases per million are highlighted in color (as ordered from  
342 most to least in the legend). Dates on the x-axis start from February 25th given how few COVID-  
343 related campaigns were present before this date.

344

345 **Figure 4.** COVID-related campaigns per category a) by week and b) by day. Only the top 8 (of  
346 the 17 possible) categories are shown. The legend is ordered from most to least common  
347 category. Dates on the x-axis start from February 25th given how few COVID-related campaigns  
348 were present before this date.

349

350



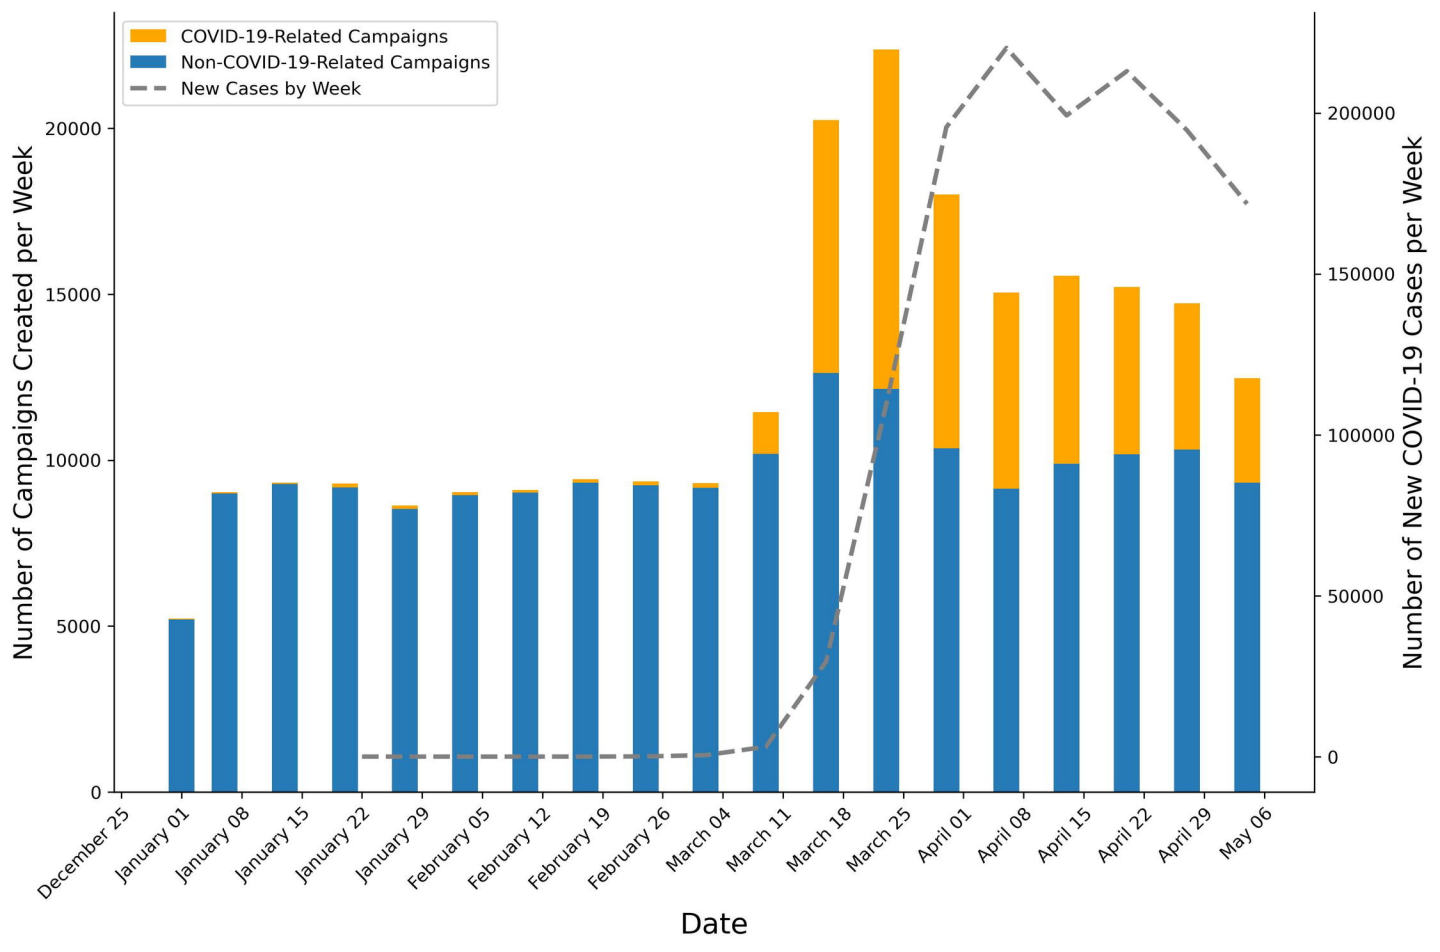

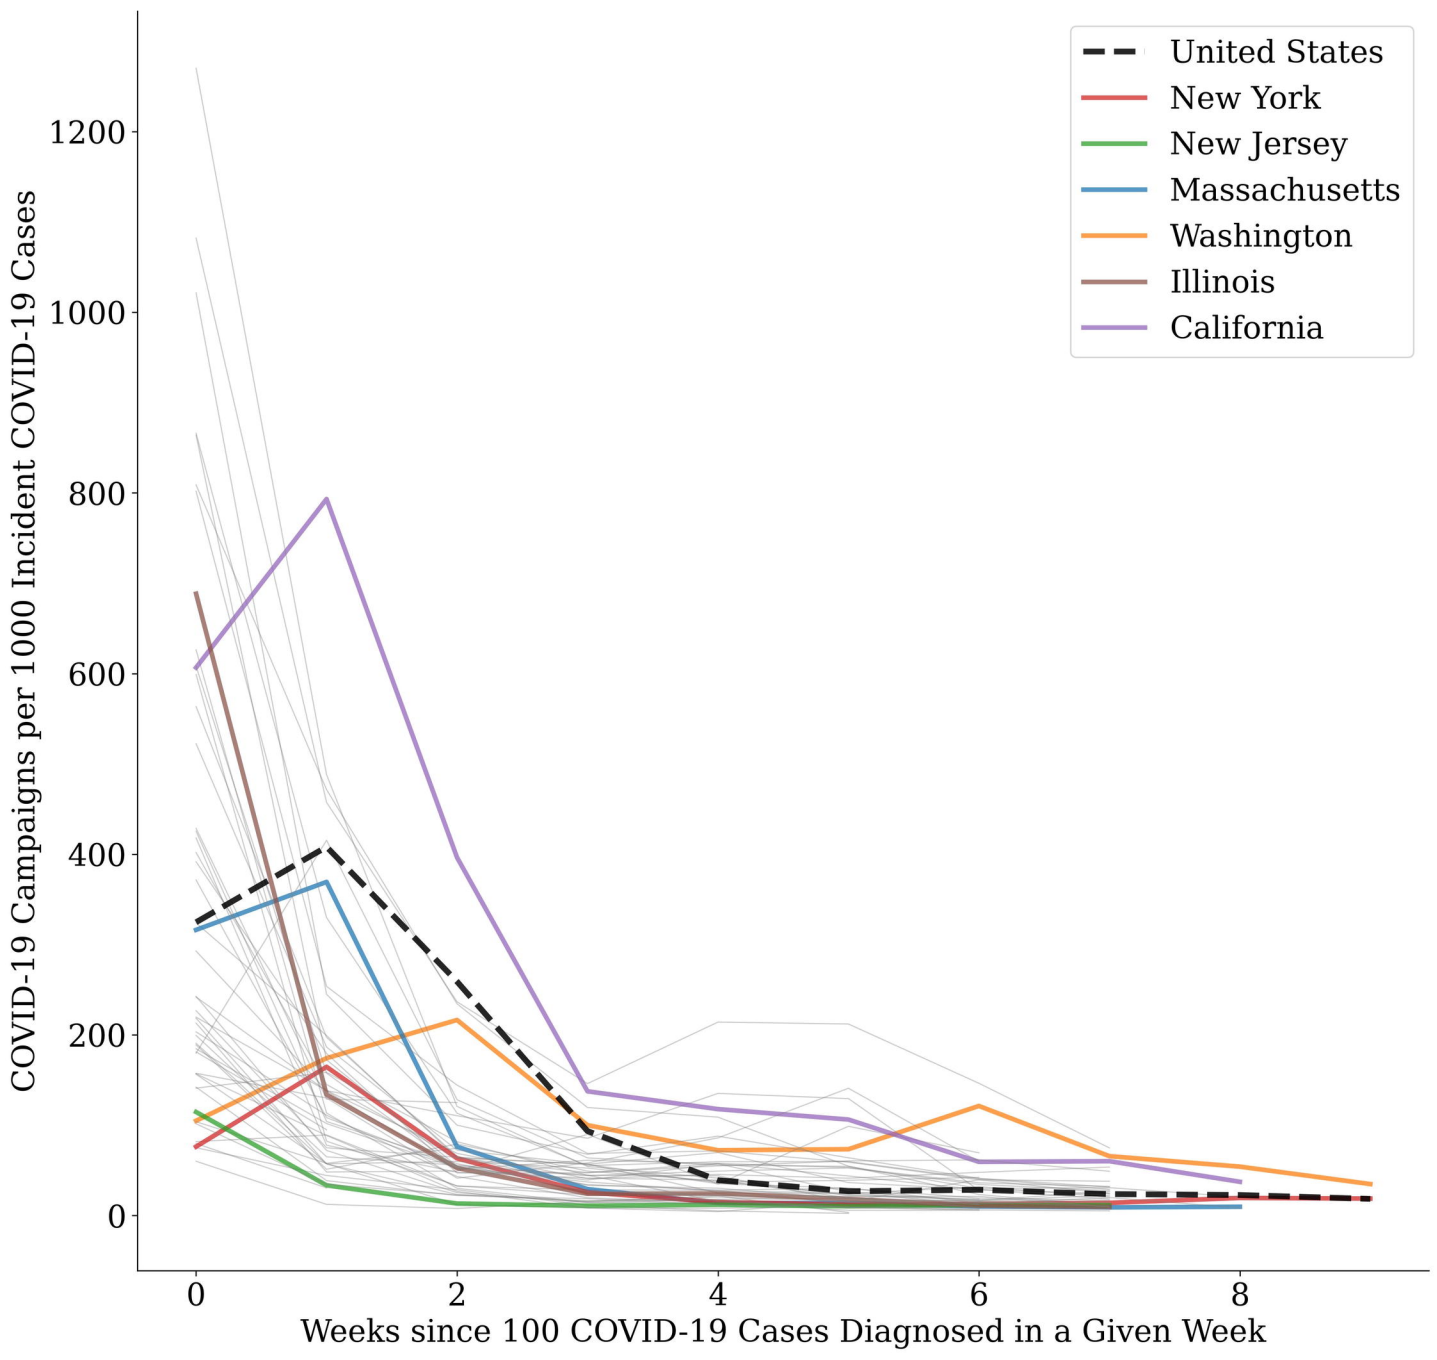

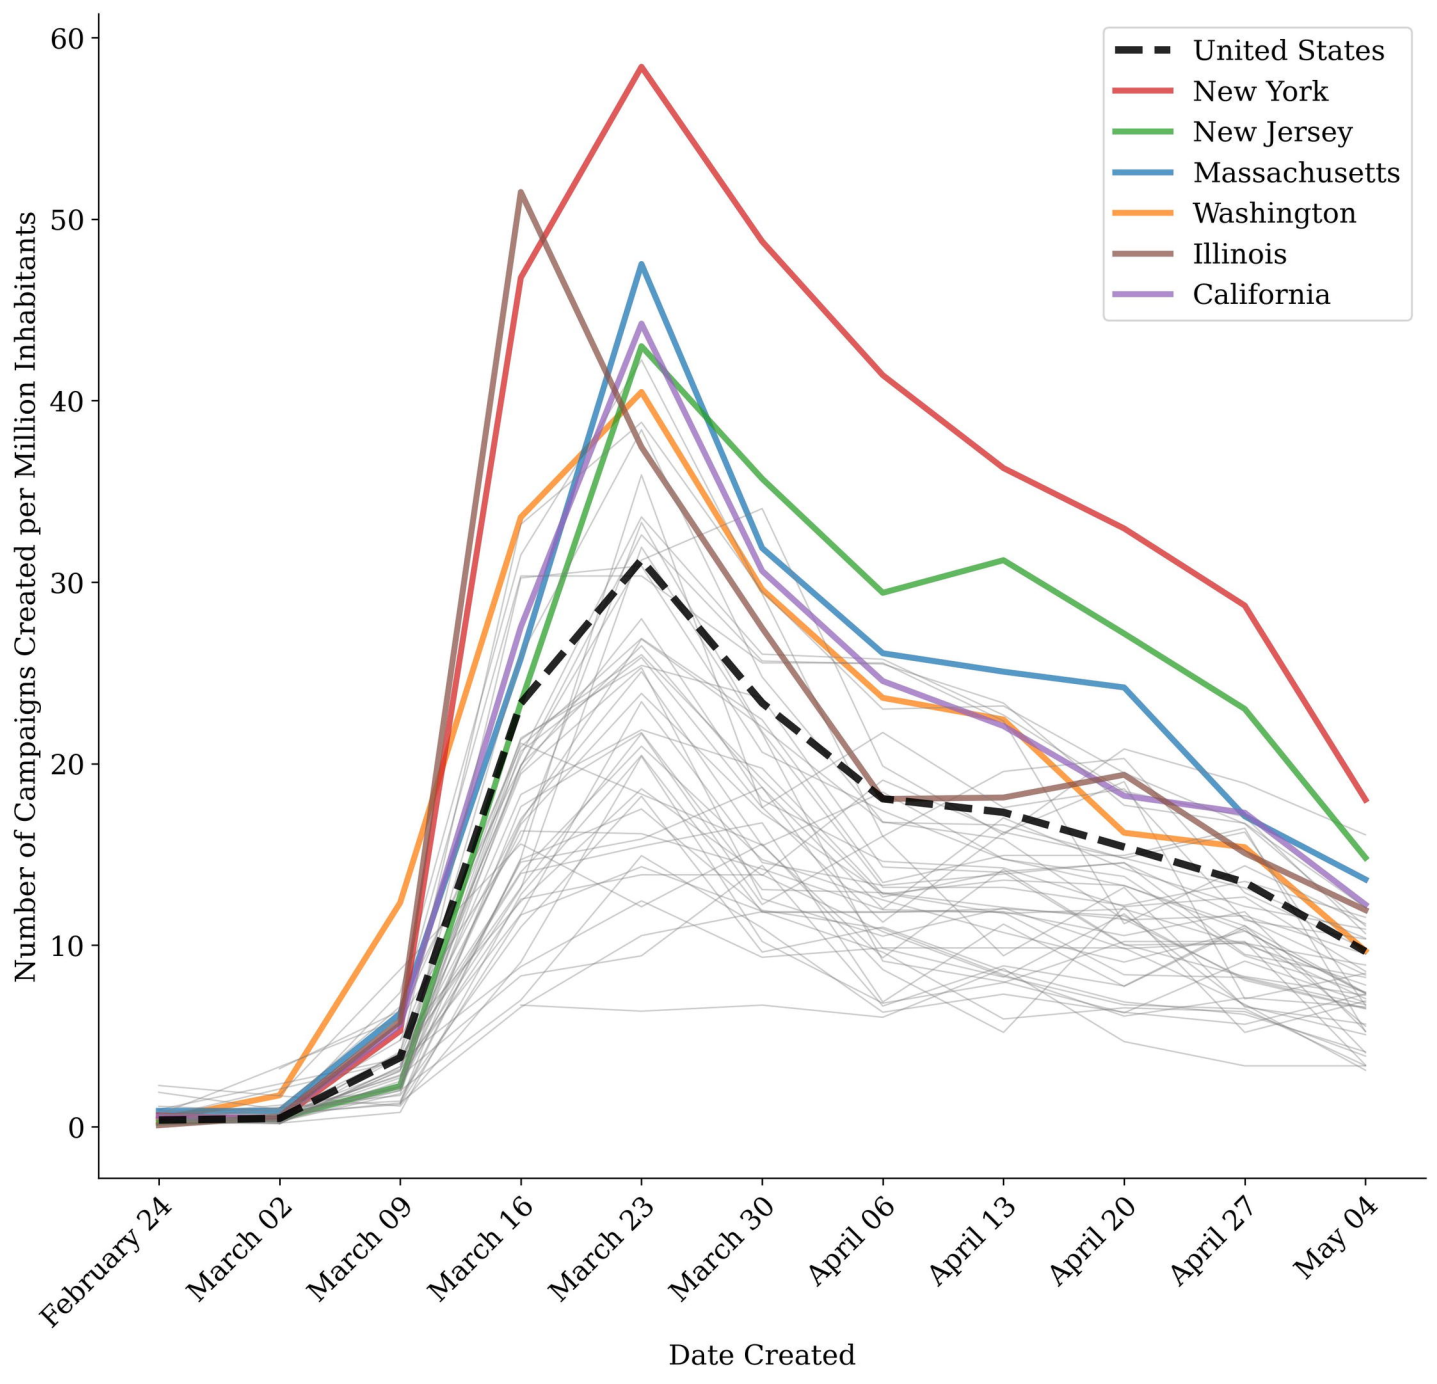

**A**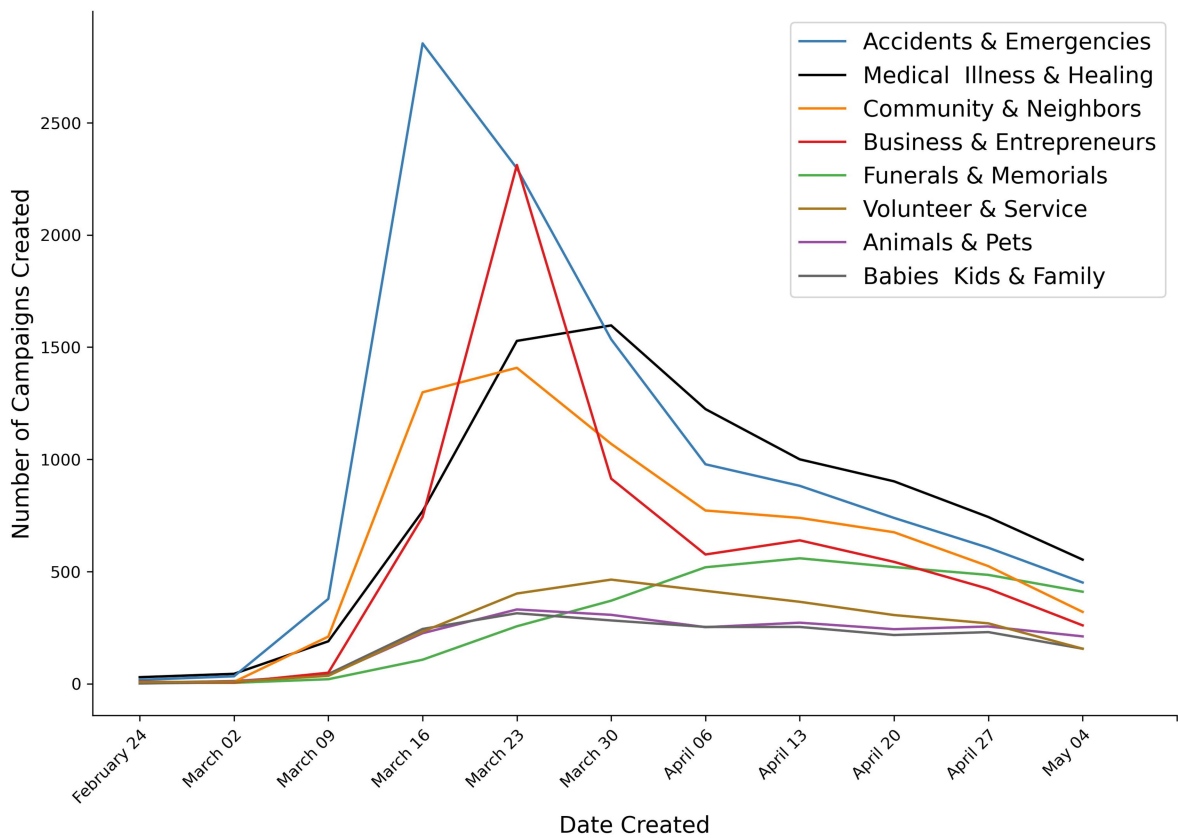**B**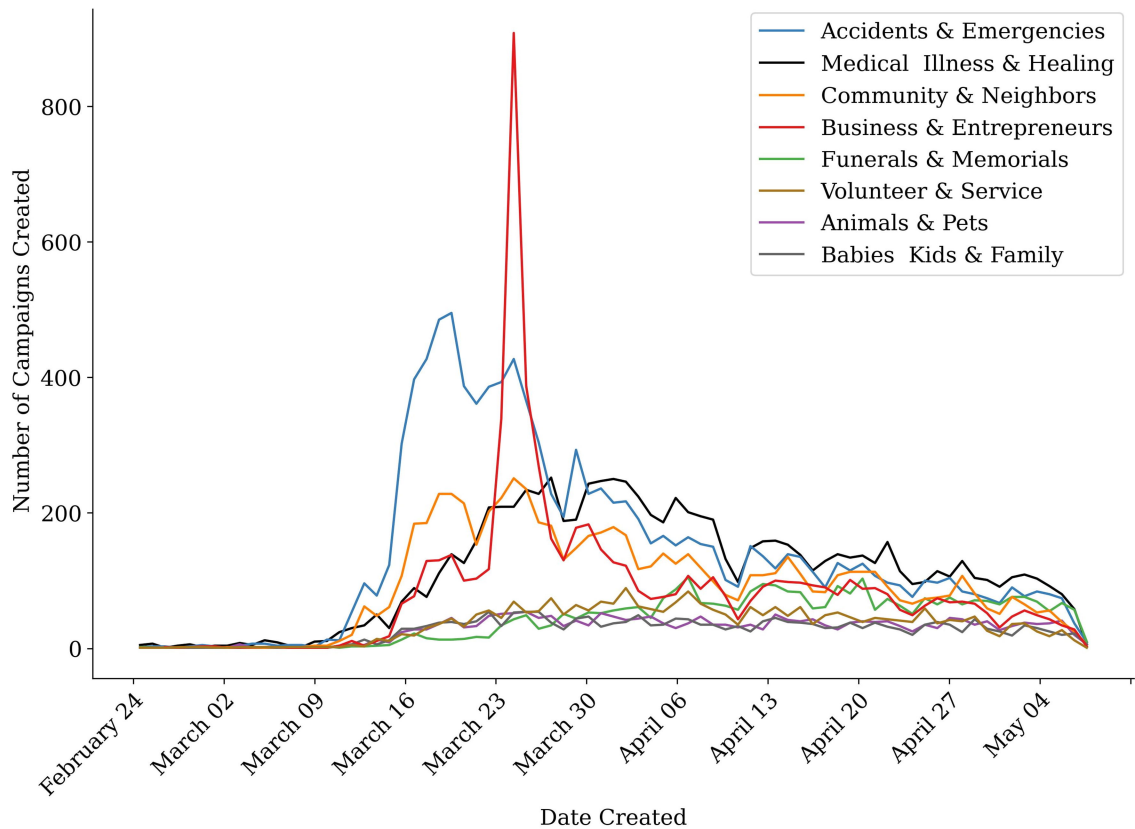

Source: https://medrxiv.org/content/10.1101/2020.10.12.20211532v1.full.pdf
